# Supplementary material for: Pharmacology activity, toxicity, and clinical trials of Erythrina genus plants (Fabaceae): an evidence-based review
Source: Front Pharmacol. 2023 Nov 16;14:1281150. doi: 10.3389/fphar.2023.1281150 (PMC10690608; doi:10.3389/fphar.2023.1281150)
Supplement: Supplementary file 2 [file Table2.docx]

**Table 2.** Studies of Metabolites Isolated from Erythrina Genus Plants on Different Pharmacological Assays

| Name of Metabolite isolated from Erythrina Genus Plants | Chemical Structure  (Molecular Formula; PubChem CID) | Pharmacological Assay Method | Reference |
| --- | --- | --- | --- |
| **Flavonoids** | | | |
| 5-Hydroxysophoranone | 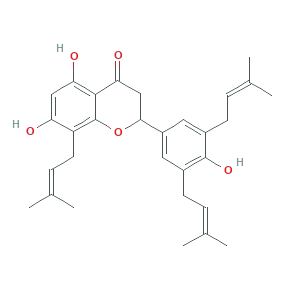  (C30H36O5; PubChem CID 42607927) | *In vitro* α-glucosidase inhibitory assay using acarbose as a positive control. | [5] |
| *In vitro* glycation inhibitory assay using quercetin as a positive control. | [5] |
| *In vitro* antiplasmodial activity against *P. falciparum* | [52] |
| 4′-hydroxy-6,3′,5′-triprenylisoflavanone | The chemical structure is not available in PubChem. | *In vitro* glycation inhibitory assay using quercetin as a positive control. | [5] |
| *In vitro* α-glucosidase inhibitory assay using acarbose as a positive control. | [5] |
| Pinocembrin | 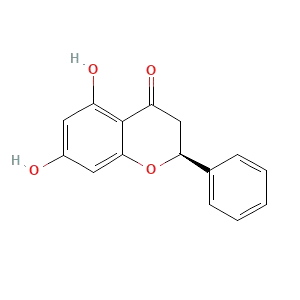  (C15H12O4; PubChem CID 68071) | *In vitro* α-glucosidase inhibitory assay using acarbose as a positive control. | [5] |
| *In vitro* glycation inhibitory assay using quercetin as a positive control. | [5] |
| 3,6,4′-trihydroxy flavone | The chemical structure is not available in PubChem. | *In vitro* α-glucosidase inhibitory assay using acarbose as a positive control. | [5] |
| *In vitro* glycation inhibitory assay using quercetin as a positive control. | [5] |
| 3,6-dihydroxyflavone | 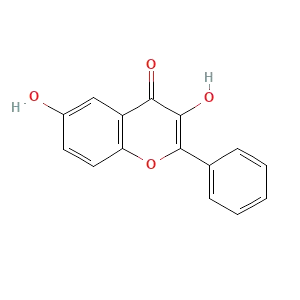  (C15H10O4; PubChem CID 688659) | *In vitro* α-glucosidase inhibitory assay using acarbose as a positive control. | [5] |
| *In vitro* glycation inhibitory assay using quercetin as a positive control. | [5] |
| 5-methoxy-7-hydroxy flavone | The chemical structure is not available in PubChem. | *In vitro* α-glucosidase inhibitory assay using acarbose as a positive control. | [5] |
| *In vitro* glycation inhibitory assay using quercetin as a positive control. | [5] |
| Lupalbigenin | 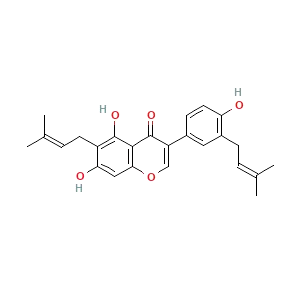  (C25H26O5; PubChem CID 10001388) | *In vitro* α-glucosidase inhibitory assay using acarbose as a positive control. | [5] |
| *In vitro* glycation inhibitory assay using quercetin as a positive control. | [5] |
| Erysubin F | 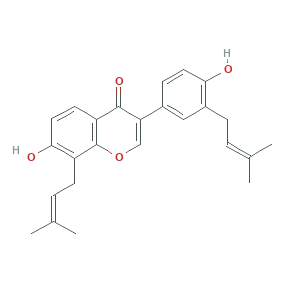  (C25H26O4; PubChem CID 12051847) | *In vitro* α-glucosidase inhibitory assay using acarbose as a positive control. | [5] |
| *In vitro* glycation inhibitory assay using quercetin as a positive control. | [5] |
| Genistein | 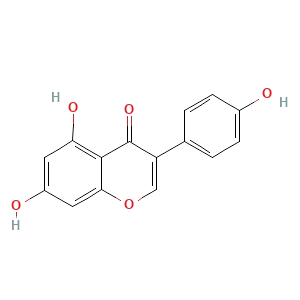  (C15H10O5; PubChem CID 5280961) | *In vitro* α-glucosidase inhibitory assay using acarbose as a positive control. | [5] |
| *In vitro* glycation inhibitory assay using quercetin as a positive control. | [5] |
| Estrogenic activity on 1-month-old immature female CD-1 mice *(Mus musculus*) | [42] |
| 8-prenyl genistein | The chemical structure is not available in PubChem. | Estrogenic activity on 1-month-old immature female CD-1 mice *(Mus musculus*) | [42] |
| 7,2′,4′-trihydroxy-8,3′,5′-(3″-methyl-but-2″-enyl) flavanone | The chemical structure is not available in PubChem. | *In vitro* α-glucosidase inhibitory assay using acarbose as a positive control. | [5] |
| *In vitro* glycation inhibitory assay using quercetin as a positive control. | [5] |
| Abyssinone V | 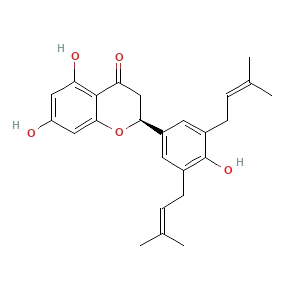  (C25H28O5; PubChem CID 442153) | *In vitro* α-glucosidase inhibitory assay using acarbose as a positive control. | [5] |
| *In vitro* glycation inhibitory assay using quercetin as a positive control. | [5] |
| Abyssinone V-4′ methyl ether | 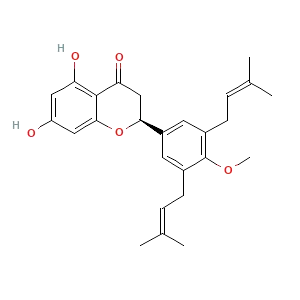  (C26H30O5; PubChem CID 6548074) | Antibacterial activity on Gram-negative and Gram-positive strains. | [18] |
| Eryzerin C | 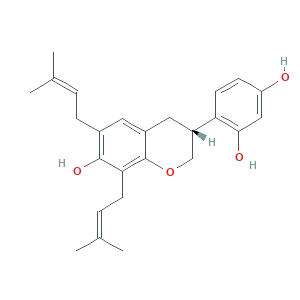  (C25H30O4; PubChem CID 10092034) | Antibacterial activity on Gram-negative and Gram-positive strains. | [18] |
| Lysisteisoflavone | 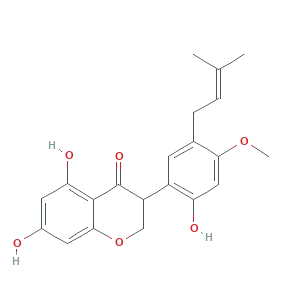  (C21H22O6; PubChem CID 5319135) | Antibacterial activity on Gram-negative and Gram-positive strains. | [18] |
| Wighteone (synonym = erythrinin B) | 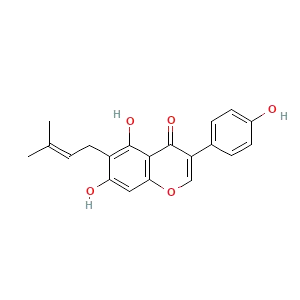  (C20H18O5; PubChem CID 5281814) | Antidiabetic and antiobesity by inhibiting PTP1B activity | [31] |
| Alpumisoflavone | 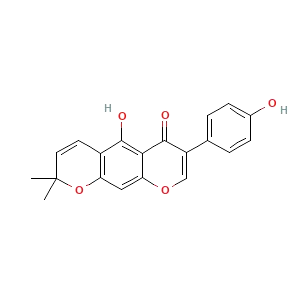  (C20H16O5; PubChem CID5490139) | Antibacterial activity on Gram-negative and Gram-positive strains. | [18] |
| Anticancer activity on human leukemia HL-60 cells | [24] |
| Anticancer activity on human lung cancer cell lines H2108 and H1299 | [25] |
| 4'-methoxy licoflavanone | The chemical structure is not available in PubChem. | Anticancer activity on human leukemia HL-60 cells | [24] |
| Licoflavanone-4’-O-methyl ether | | The chemical structure is not available in PubChem. | Antidiabetic and antiobesity by inhibiting PTP1B activity | [31] |
| 2’,7-dihydroxy-4’-methoxy-5’-(3-methyl but-2-enyl) isoflavone | | The chemical structure is not available in PubChem. | Antidiabetic and antiobesity by inhibiting PTP1B activity | [31] |
| Parisoflavone B | | The chemical structure is not available in PubChem. | Antidiabetic and antiobesity by inhibiting PTP1B activity | [31] |
| Derrone | | 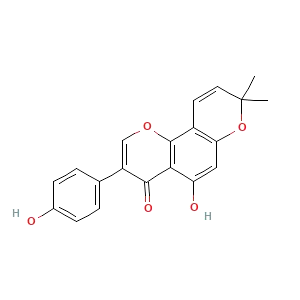  (C20H16O5; PubChem CID14704457) | Aurora kinase inhibitor on recombinant Aurora A, Aurora B, Aurora A domain, and histone H3 proteins expressed as N-terminal His6-tagged fusion proteins in *E. coli* | [50] |
|  | | | |
| **Pterocarpans** | | | |
| Eryvarin E | 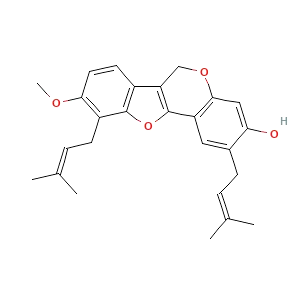  (C26H28O4; PubChem CID 15546809) | *In vitro* α-glucosidase inhibitory assay using acarbose as a positive control. | [5] |
| *In vitro* glycation inhibitory assay using quercetin as a positive control. | [5] |
| Coumestrol | 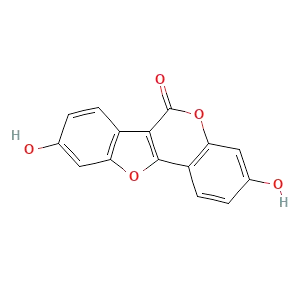  (C15H8O5; PubChem CID 5281707) | *In vitro* α-glucosidase inhibitory assay using acarbose as a positive control. | [5] |
| *In vitro* glycation inhibitory assay using quercetin as a positive control. | [5] |
| Eryvarin D | 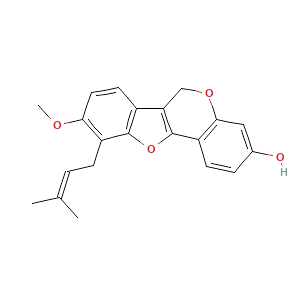  (C21H20O4; PubChem CID 15546808) | *In vitro* α-glucosidase inhibitory assay using acarbose as a positive control. | [5] |
| *In vitro* glycation inhibitory assay using quercetin as a positive control. | [5] |
| 1-methoxyerythrabyssin II | 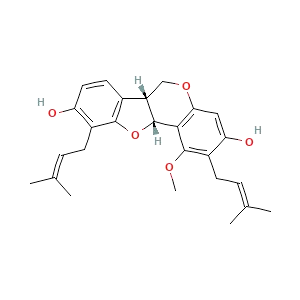  (C26H30O5; PubChem CID 24761044) | *In vitro* α-glucosidase inhibitory assay using acarbose as a positive control. | [5] |
| *In vitro* glycation inhibitory assay using quercetin as a positive control. | [5] |
| Erythrabyssin II | 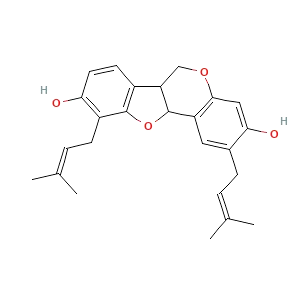  (C25H28O4; PubChem CID 5086400) | *In vitro* α-glucosidase inhibitory assay using acarbose as a positive control. | [5] |
| *In vitro* glycation inhibitory assay using quercetin as a positive control. | [5] |
| Erycristagallin | 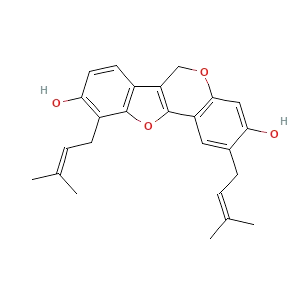  (C25H26O4; PubChem CID 10362969) | *In vitro* α-glucosidase and α-amylase inhibitory assay using acarbose as a positive control. | [5] |
| *In vitro* glycation inhibitory assay using quercetin as a positive control. | [5] |
| Erythribyssin N | 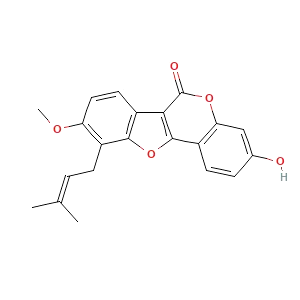  (C21H18O5; PubChem CID 46210318) | *In vitro* α-glucosidase and α-amylase inhibitory assay using acarbose as a positive control. | [5] |
| *In vitro* glycation inhibitory assay using quercetin as a positive control. | [5] |
| Erycristin | 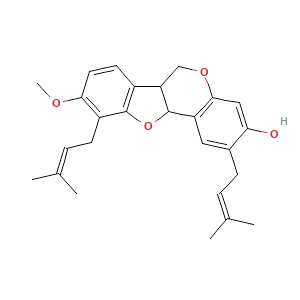  (C26H30O4; PubChem CID 13994537) | *In vitro* α-glucosidase and α-amylase inhibitory assay using acarbose as a positive control. | [5] |
| *In vitro* glycation inhibitory assay using quercetin as a positive control. | [5] |
| Sandwicensin | 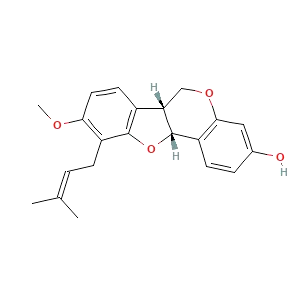  (C21H22O4; PubChem CID 467498) | *In vitro* α-glucosidase and α-amylase inhibitory assay using acarbose as a positive control | [5] |
| *In vitro* glycation inhibitory assay using quercetin as a positive control. | [5] |
| Gangetin | 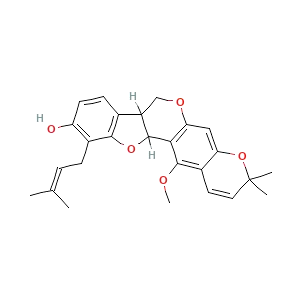  (C26H28O5; PubChem CID 317611) | *In vitro* α-glucosidase and α-amylase inhibitory assay using acarbose as a positive control | [5] |
| *In vitro* glycation inhibitory assay using quercetin as a positive control. | [5] |
| Erypoegin J | 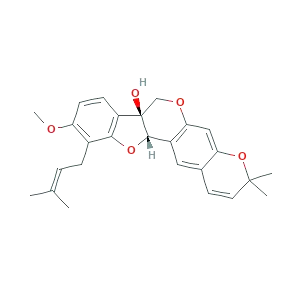  (C26H28O5; PubChem CID 11133568) | *In vitro* α-glucosidase and α-amylase inhibitory assay using acarbose as a positive control | [5] |
| *In vitro* glycation inhibitory assay using quercetin as a positive control. | [5] |
| Erybraedin A | 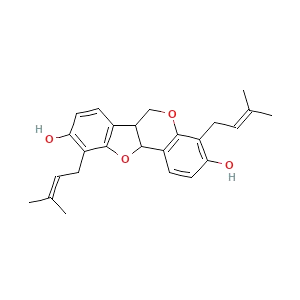  (C25H28O4; PubChem CID 362562) | Antibacterial activity on Gram-negative and Gram-positive strains. | [18] |
| Phaseollidin | 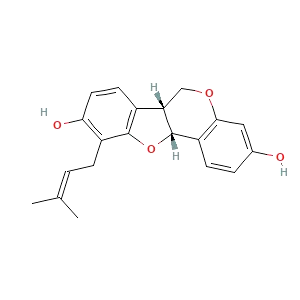  (C20H20O4; PubChem CID 119268) | *In vitro* α-glucosidase and α-amylase inhibitory assay using acarbose as a positive control | [5] |
| Antibacterial activity on Gram-negative and Gram-positive strains. | [18] |
| Cytotoxicity activity using brine shrimp lethal toxicity assay | [54] |
| Orientanol C | 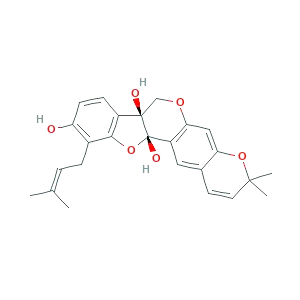  (C25H26O6; PubChem CID 42607512) | Anticancer activity on H4IIE hepatoma cells. | [26] |
| *In vitro* α-glucosidase and α-amylase inhibitory assay using acarbose as a positive control | [5] |
| Cristacarpin | 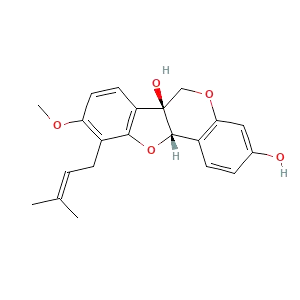  (C21H22O5; PubChem CID 126540) | Antibacterial activity on Gram-negative and Gram-positive strains. | [18] |
| Anticancer activity on H4IIE hepatoma cells. | [26] |
| Calopocarpin | 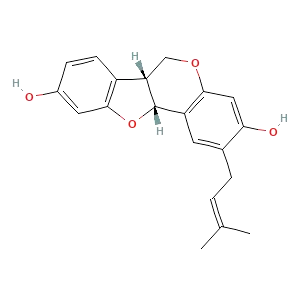  (C20H20O4;PubChem CID11709595) | Anticancer activity on H4IIE hepatoma cells. | [26] |
| Isoneorautenol | 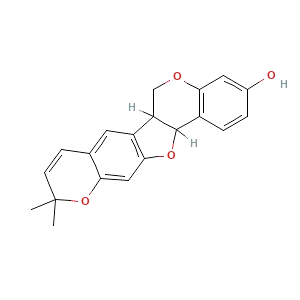  (C20H18O4; PubChem CID 73649) | Anticancer activity on H4IIE hepatoma cells. | [26] |
| Neorautenol | 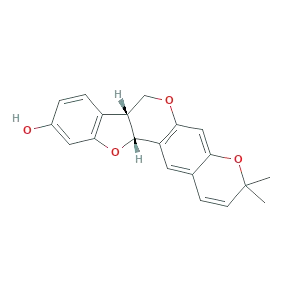  (C20H18O4; PubChem CID 11500744) | Anticancer activity on H4IIE hepatoma cells. | [26] |
| Phaseollin | 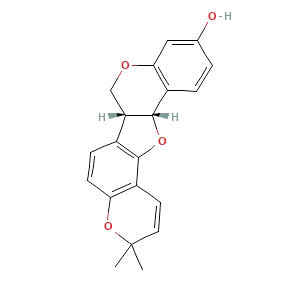  (C20H18O4; PubChem CID 91572) | Anticancer activity on H4IIE hepatoma cells. | [26] |
|  | | | |
| **Alkaloids** | | | |
| Hydroxyerysotrine | 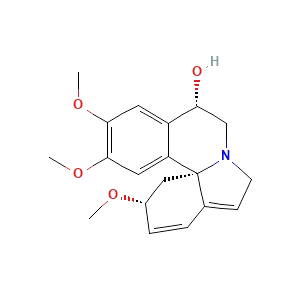  (C19H23NO4; PubChem CID 91572) | Anticancer activity on human leukemia HL-60 cells | [24] |
| Erythraline | 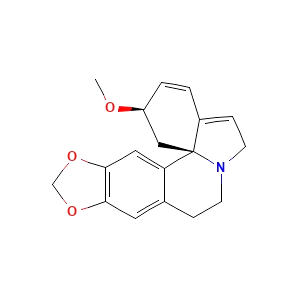  (C18H19NO3; PubChem CID 5317205) | Anti-inflammatory by inhibiting NO production on RAW264.7 cells | [41] |
| Leishmanicidal activity against the promastigote forms of *L. amazonensis* obtained from infected mice | [45] |
| Curare-like action on frogs | [55] |
| Erythrinine | 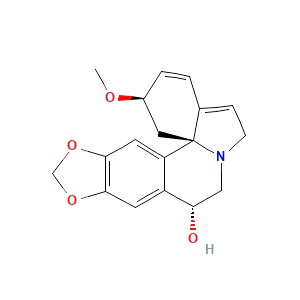  (C18H19NO4; PubChem CID 3084503) | Anti-inflammatory by inhibiting NO production on RAW264.7 cells | [41] |
| Hypaphorine | 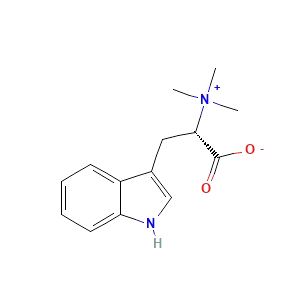  (C14H19N2O2; PubChem CID 442106) | Anti-inflammatory by inhibiting NO production on RAW264.7 cells | [41] |
| Erythramine | 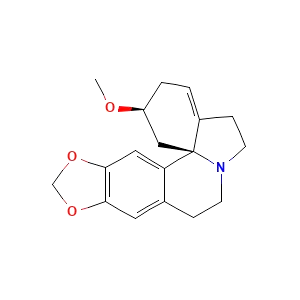  (C18H21NO3; PubChem CID 101289752) | Curare-like action on frogs | [55] |
| Erythratine | 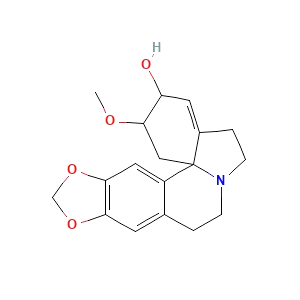  (C18H21NO4; PubChem CID 617879) | Curare-like action on frogs | [55] |
| Beta-erythroidine | 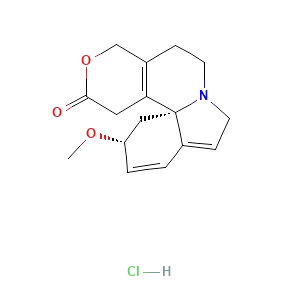  (C16H20ClNO3; PubChem CID 54601205) | Curare-like action on frogs | [55] |
|  | | | |
| **Glycosides** | | | |
| Vitexin | 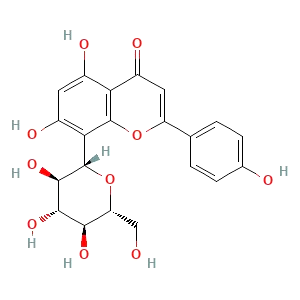  (C21H20O10; PubChem CID 5280441) | Modulator of fear memory on male Wistar rats (*Rattus norvegicus*) | [49] |
| Isovitexin | 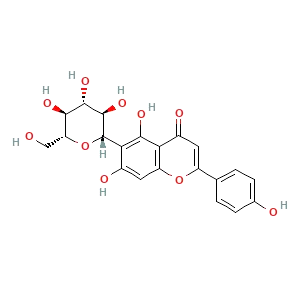  (C21H20O10; PubChem CID 162350) | Modulator of fear memory on male Wistar rats (*Rattus norvegicus*) | [49] |
| Diosmetin-6-C-glucoside | 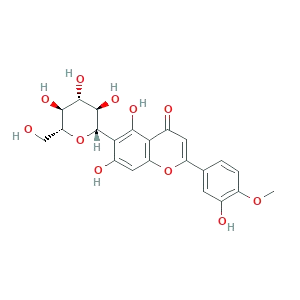  (C22H22O11; PubChem CID 162350) | Modulator of fear memory on male Wistar rats (*Rattus norvegicus*) | [49] |
| Vicenin 2 | 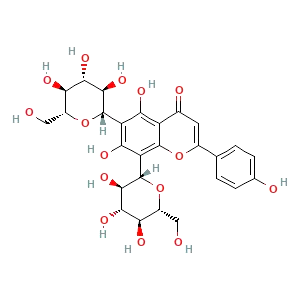  (C27H30O15; PubChem CID 442664) | Modulator of fear memory on male Wistar rats (*Rattus norvegicus*) | [49] |
|  | | | |
| **Coumarins** | | | |
| Xanthoxyletin | 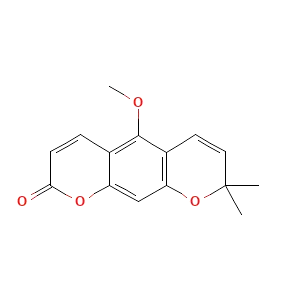  (C15H14O4; PubChem CID 66548) | Anticancer activity on SGC-7901 cells. | [27] |
|  | | | |
| **Triterpenoids** | | | |
| Sophoradiol | 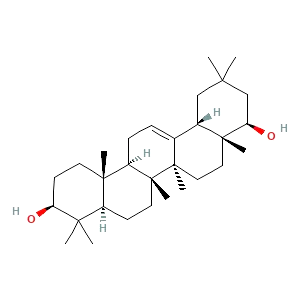  (C30H50O2; PubChem CID 9846221) | *In vitro* antiplasmodial activity against *P. falciparum* | [52] |
| Lupeol | 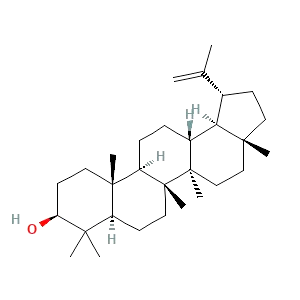  (C30H50O; PubChem CID 259846) | *In vitro* antiplasmodial activity against *P. falciparum* | [52] |
| Cycloeucalenol | The chemical structure is not available in PubChem. | *In vitro* antiplasmodial activity against *P. falciparum* | [52] |
| Melilotigenin C | 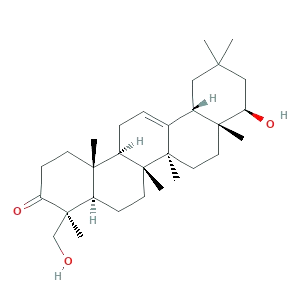  (C30H48O3; PubChem CID 10551785) | *In vitro* antiplasmodial activity against *P. falciparum* | [52] |
|  | | | |
| **Chromenes** | | | |
| 2,2-dimethyl-2H-chromene-6-carboxaldehyde | The chemical structure is not available in PubChem. | *In vitro* glycation inhibitory assay using quercetin as a positive control. | [5] |
| *In vitro* α-glucosidase inhibitory assay using acarbose as a positive control. | [5] |
|  | | | |
| **Steroids** | | | |
| Stigmast-4-en-3-one | 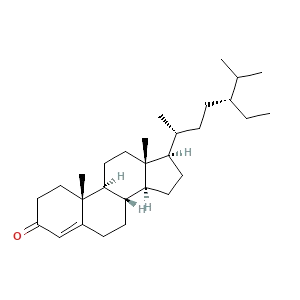  (C29H48O; PubChem CID 5484202) | *In vitro* antiplasmodial activity against *P. falciparum* | [52] |
| Stigmasta-4,22-dien-3-one | 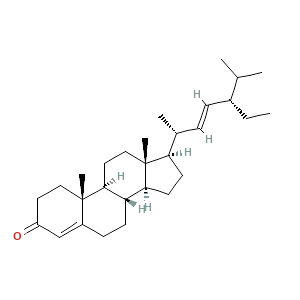  (C29H46O; PubChem CID 6442194) | *In vitro* antiplasmodial activity against *P. falciparum* | [52] |
| 3beta-hydroxystigmast-5-en-7-one | 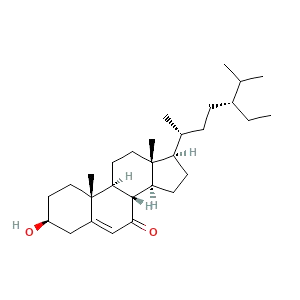  (C29H48O2; PubChem CID 160608) | *In vitro* antiplasmodial activity against *P. falciparum* | [52] |
| 3beta-hydroxystigmast-5,22-dien-7-one | The chemical structure is not available in PubChem. | *In vitro* antiplasmodial activity against *P. falciparum* | [52] |
|  | | | |
| **Carboxylic Acids** | | | |
| 2-hydroxy-4-methoxy-cinnamic acid | 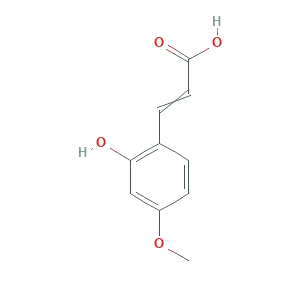  (C10H10O4; PubChem CID 20985633) | *In vitro* glycation inhibitory assay using quercetin as a positive control. | [5] |
| *In vitro* α-glucosidase inhibitory assay using acarbose as a positive control. | [5] |
| **Total = 63 metabolites** | | | |
